# Supplementary material
Source: MDPI journal article supplement (https://www.mdpi.com/1424-8247/17/3/336)
Supplement: s1 [file s1]

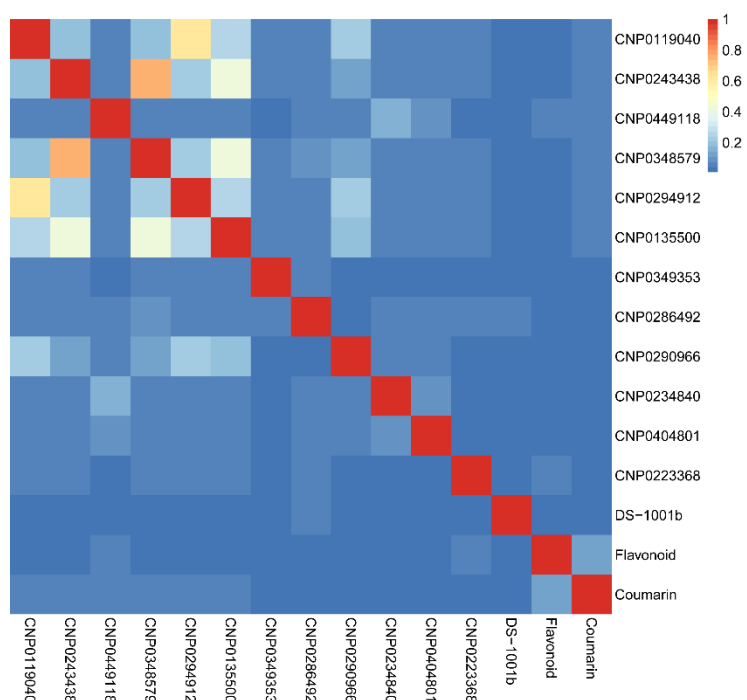

**Figure S1.** The similarity matrix from fingerprint of 12 hits, coumarin and flavonoids

**Table S1.** The Druglikeness and PAINS of the top 12 compounds.

| ID         | Druglikeness |       |       |      |        |                       | PAINS   |
|------------|--------------|-------|-------|------|--------|-----------------------|---------|
|            | Lipinski     | Ghose | Veber | Egan | Muegge | Bioavailability Score |         |
| DS-1001b   | No           | No    | Yes   | No   | No     | 0.56                  | 0 alert |
| CNP0119040 | Yes          | Yes   | Yes   | Yes  | Yes    | 0.55                  | 0 alert |
| CNP0243438 | Yes          | Yes   | Yes   | Yes  | Yes    | 0.56                  | 0 alert |
| CNP0449118 | Yes          | Yes   | Yes   | Yes  | Yes    | 0.56                  | 0 alert |
| CNP0348579 | Yes          | Yes   | Yes   | Yes  | Yes    | 0.56                  | 0 alert |
| CNP0294912 | Yes          | Yes   | Yes   | Yes  | Yes    | 0.55                  | 0 alert |
| CNP0135500 | Yes          | Yes   | Yes   | Yes  | Yes    | 0.55                  | 0 alert |
| CNP0349353 | Yes          | Yes   | Yes   | Yes  | No     | 0.85                  | 0 alert |
| CNP0286492 | Yes          | Yes   | No    | No   | Yes    | 0.56                  | 0 alert |
| CNP0290966 | Yes          | Yes   | Yes   | Yes  | Yes    | 0.55                  | 0 alert |
| CNP0234840 | Yes          | Yes   | No    | Yes  | Yes    | 0.55                  | 0 alert |
| CNP0404801 | Yes          | Yes   | Yes   | Yes  | Yes    | 0.55                  | 0 alert |
| CNP0223368 | Yes          | No    | No    | No   | Yes    | 0.55                  | 0 alert |

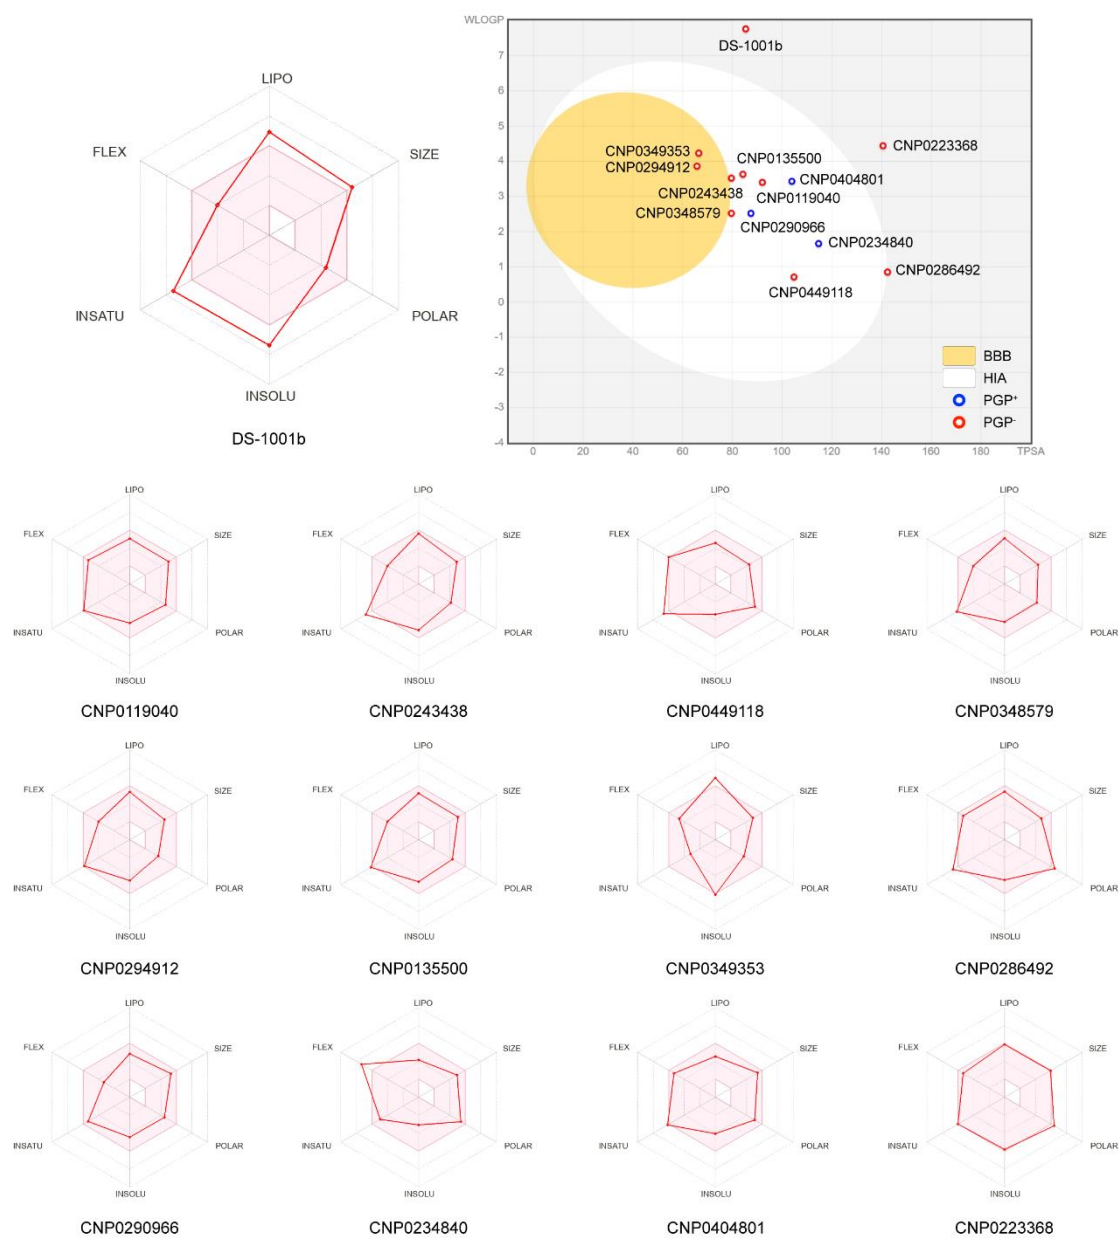

**Figure S2.** The bioactivity radar and BOILED-Egg plot of the 12 compounds

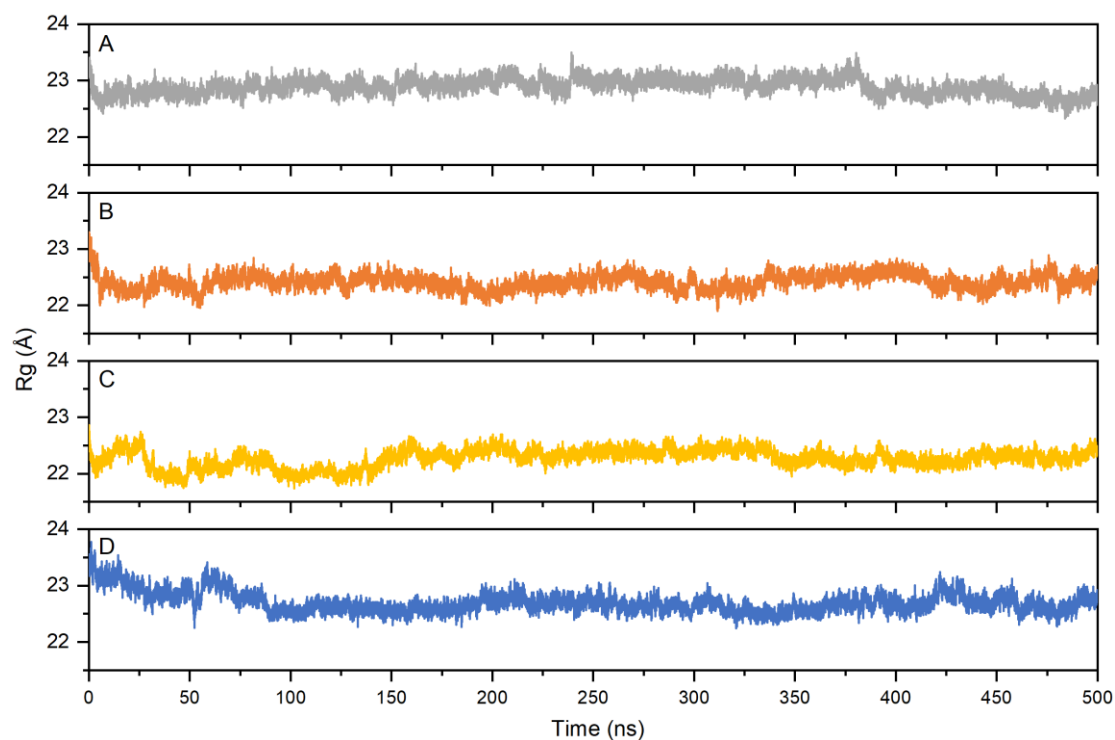

**Figure S3.** The Rg values of the DS-1001b, CNP0119040, CNP0243438, and CNP0449118 (frame interval=1).

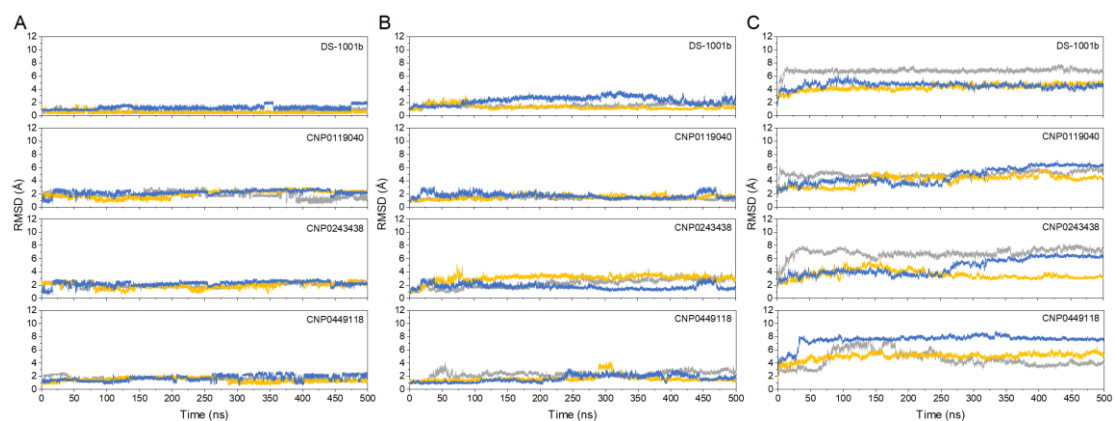

**Figure S4.** The superposition of RMSD for triplicate sample, ligand(A), pocket(B) and backbone(C).

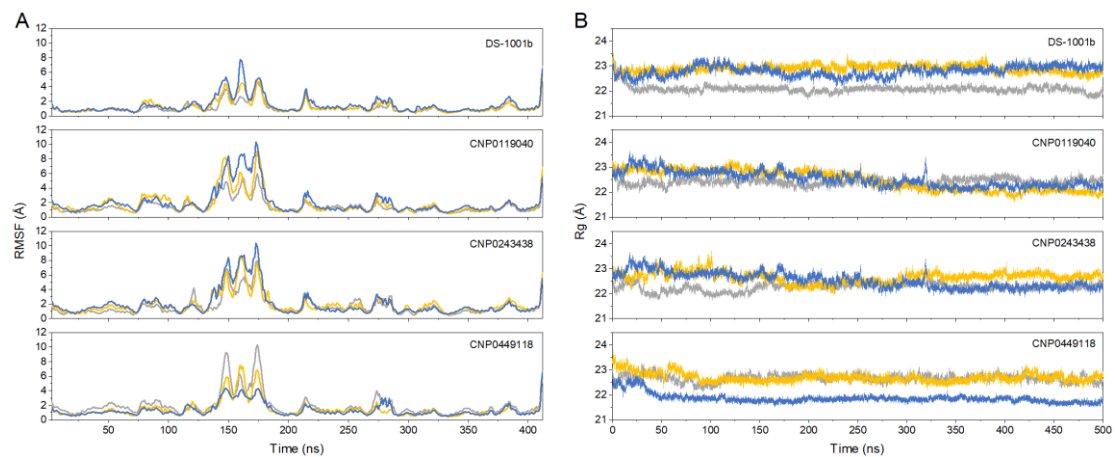

**Figure S5.** The superposition of RMSF(A) and Rg(B) for triplicate sample.
